# Supplementary material
Source: PubMed Central journal article supplement (PMC2950964)

## Figure S2; 2009

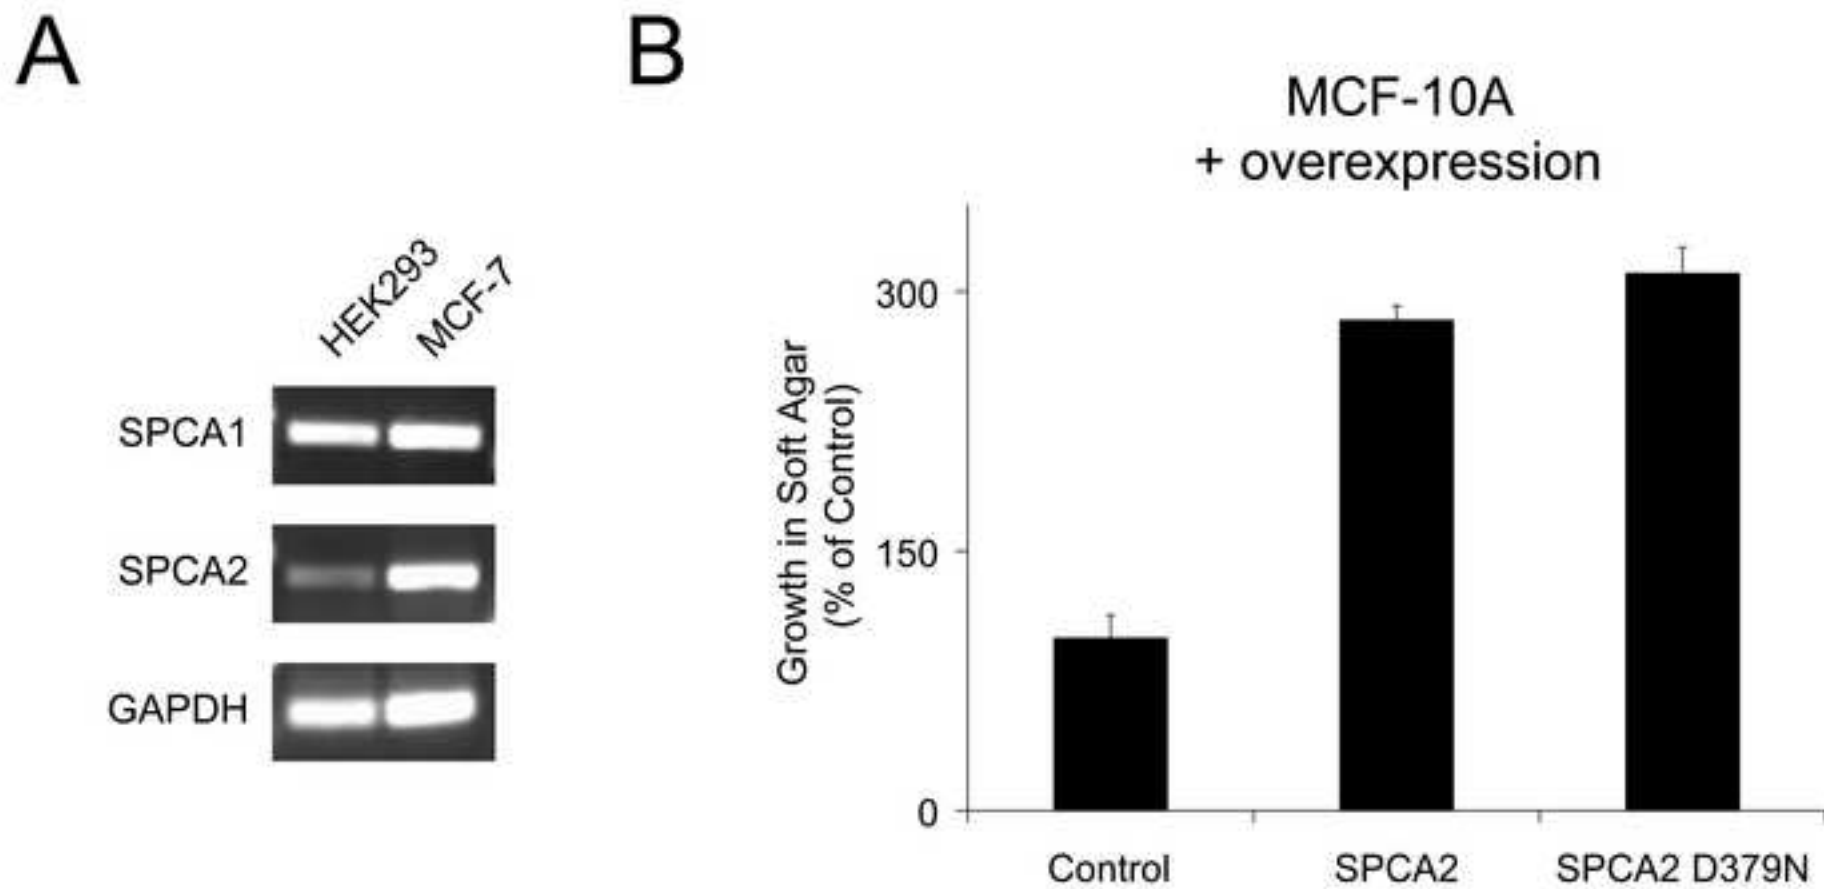

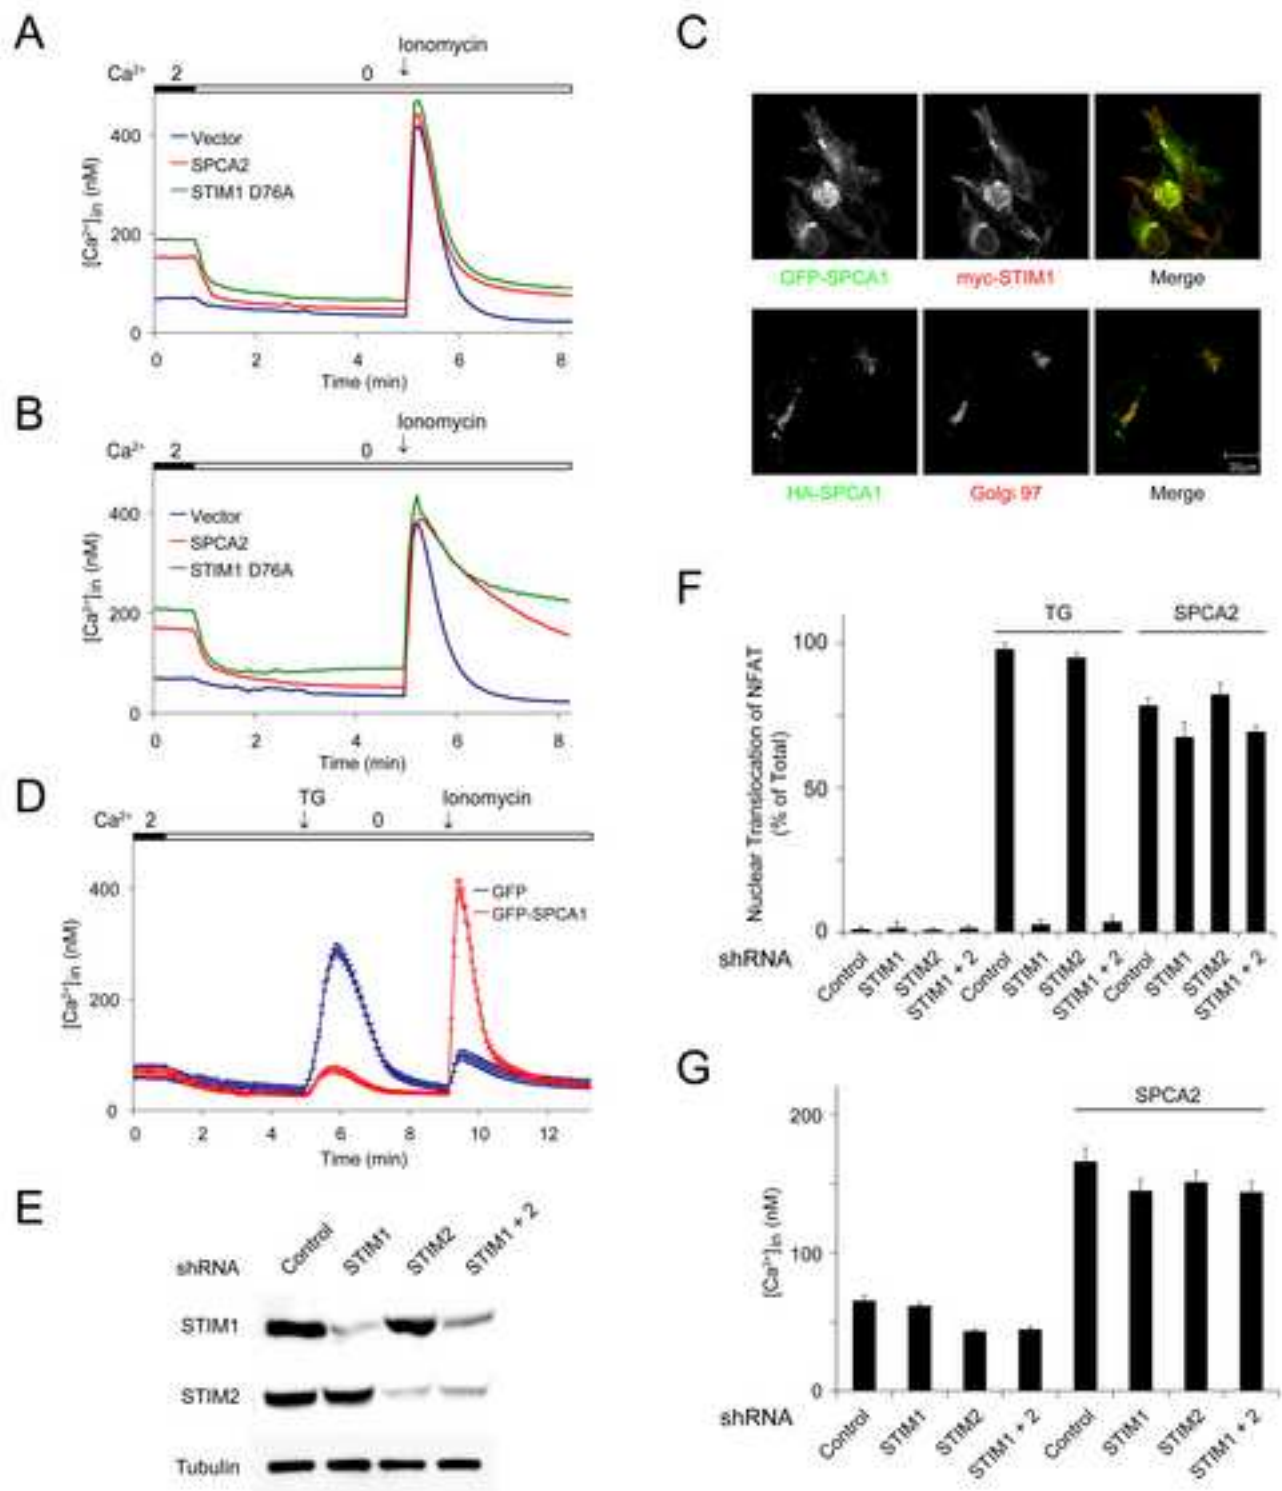

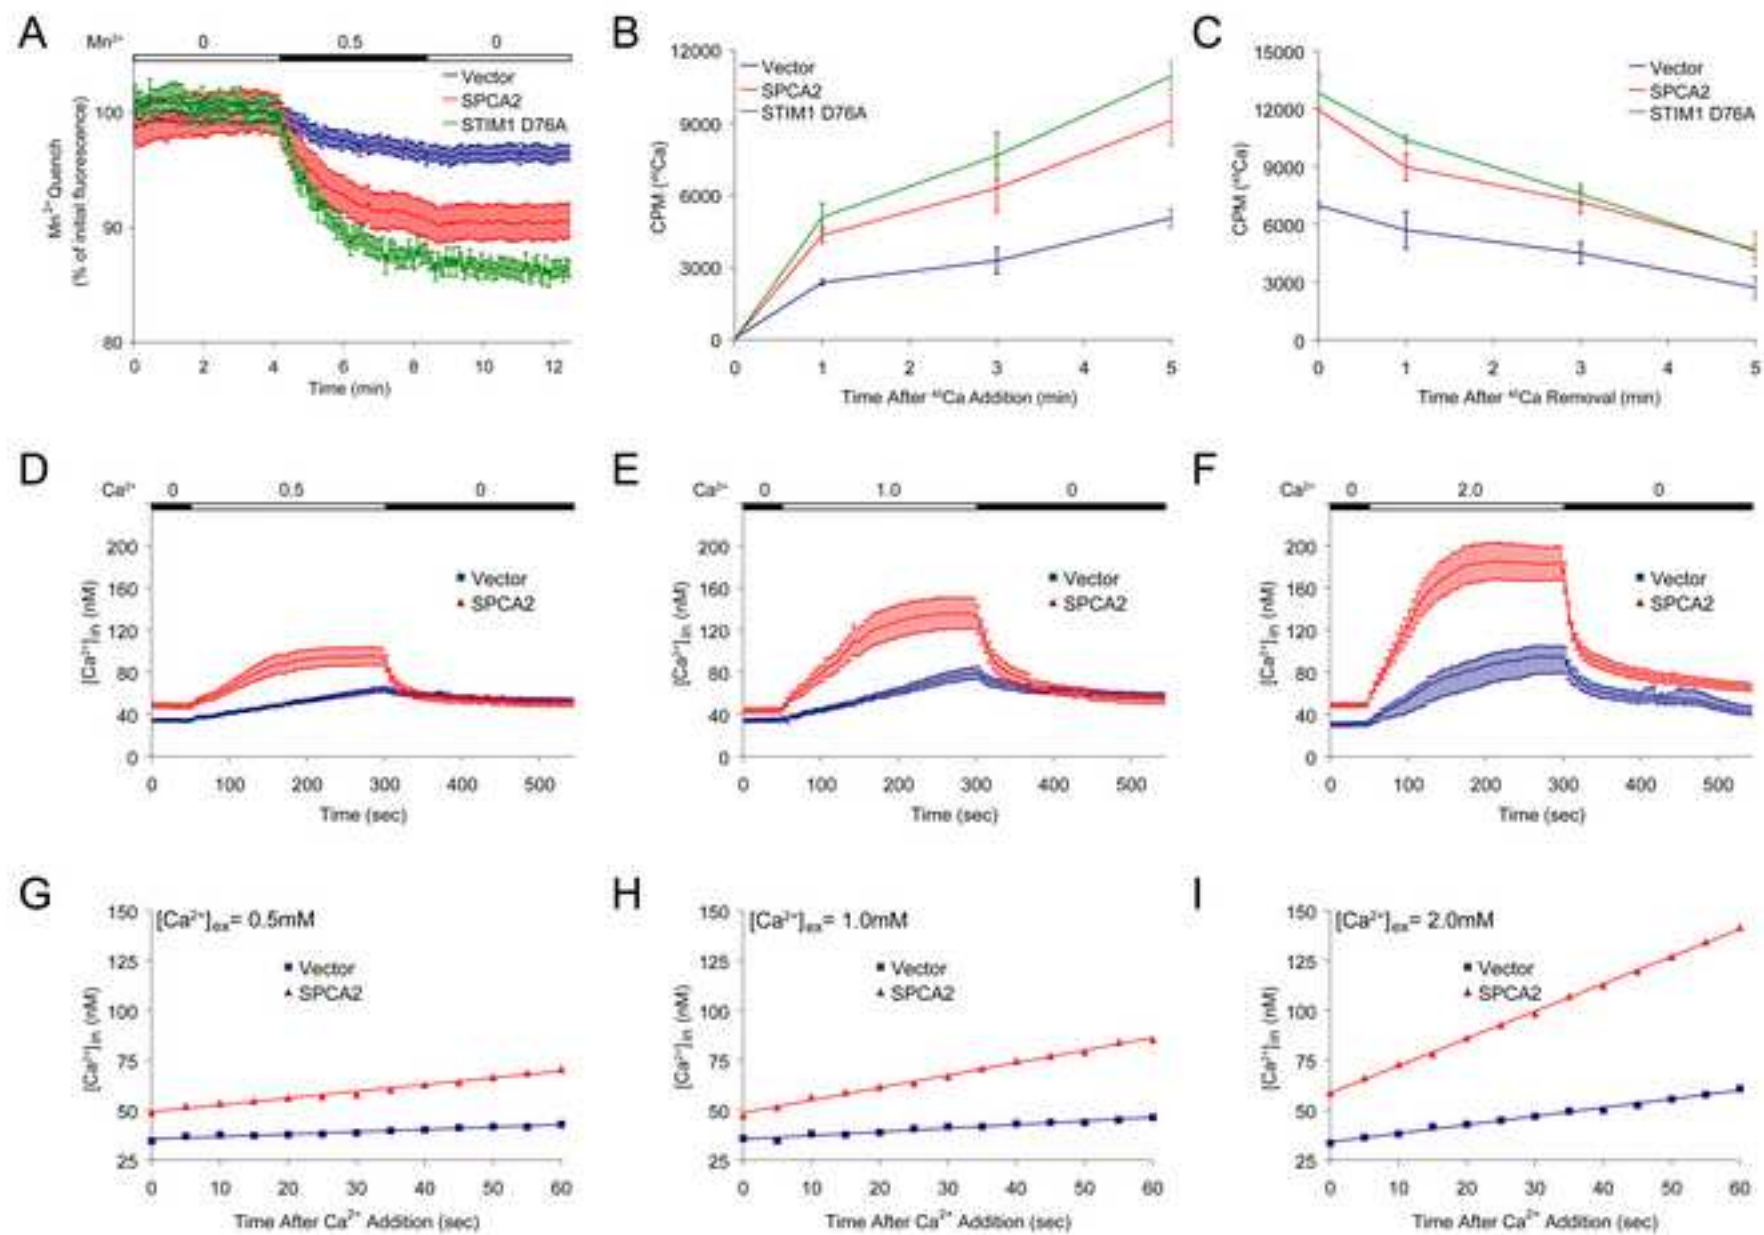

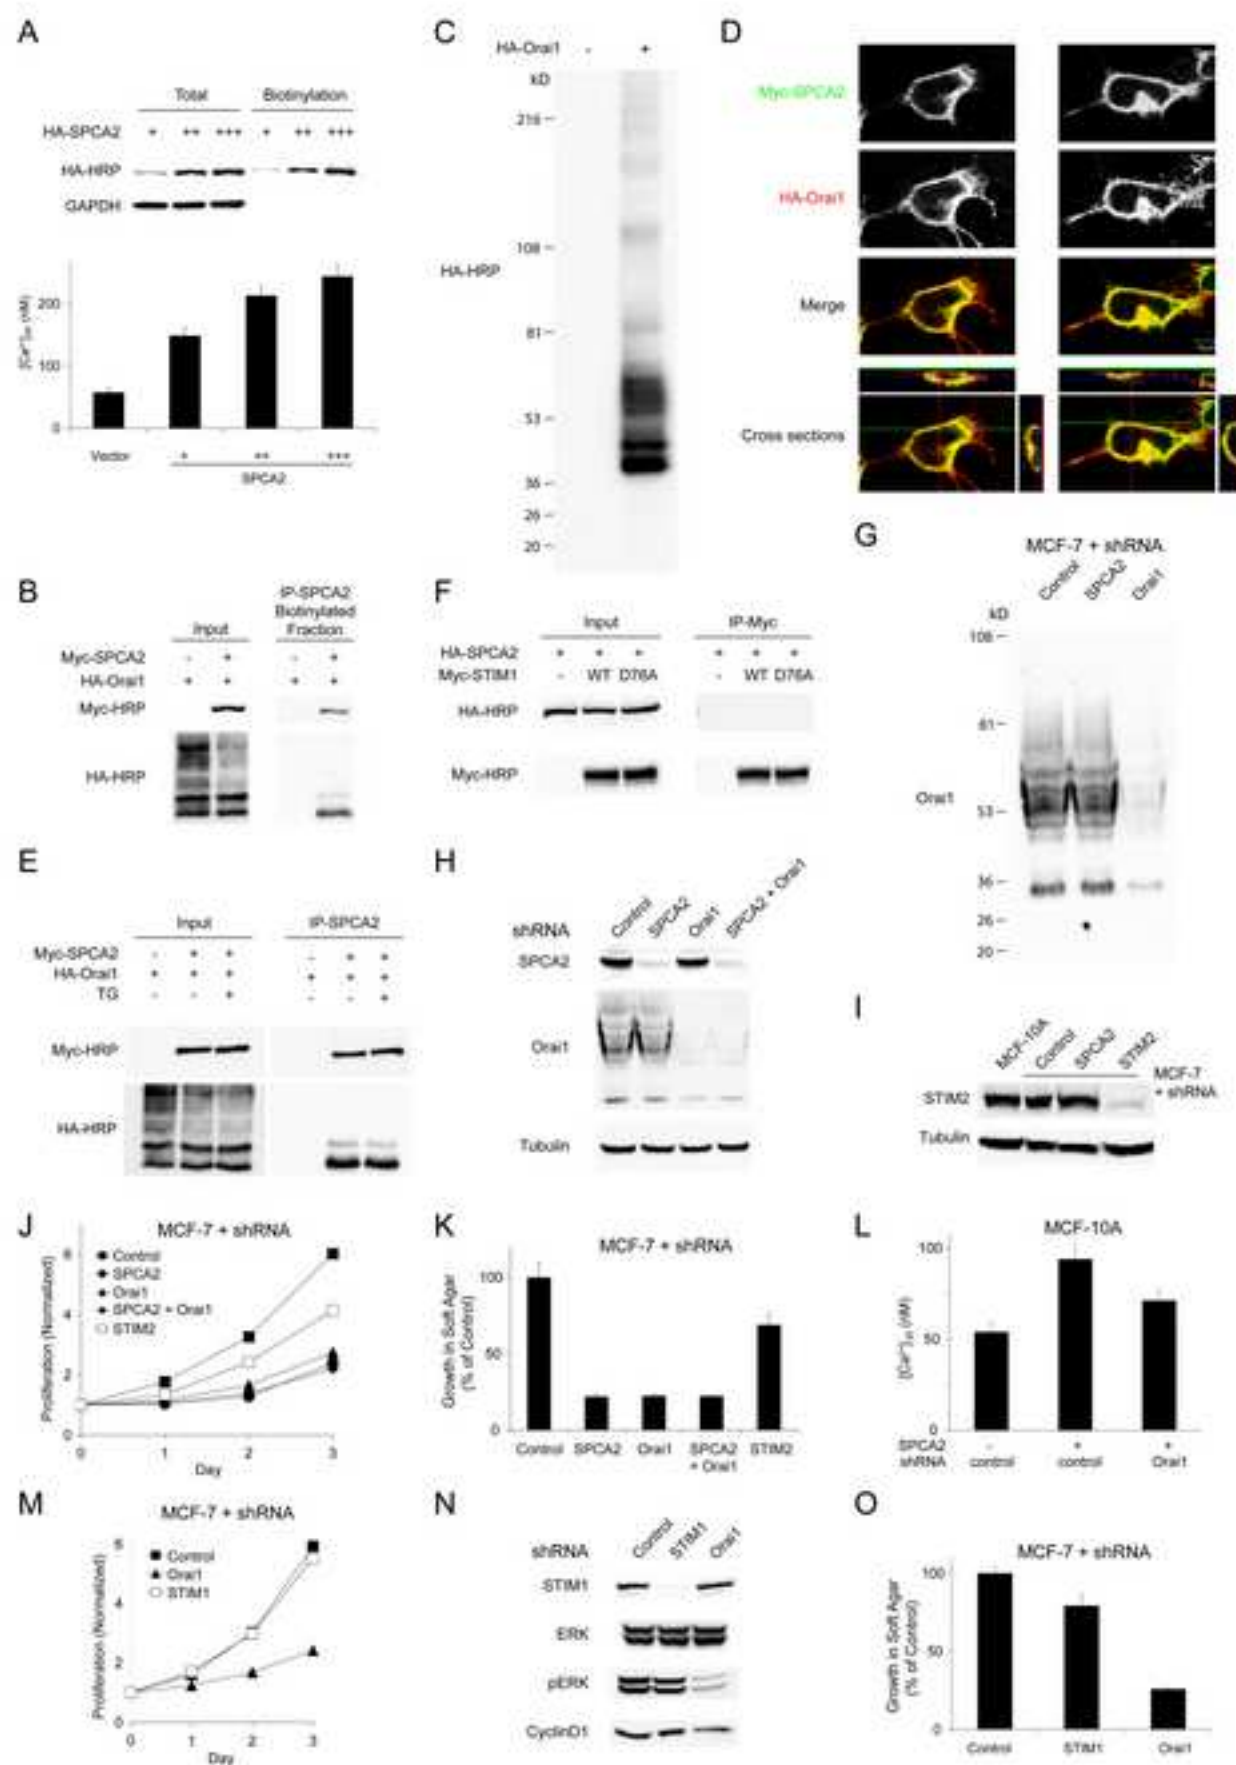

A

```

mSPCA1 -----MKVARFQKIPVVENETMIPVLTSKRASELAVSEVACLQADLQNLNKSEVSHRRAFHGWNEFDISDEEPVWKKY
rSPCA1 -----MKVARFQKIPVVENETMIPVLTSKRASELAVSEVACLQADLQNLNKSEVSHRRAFHGWNEFDISDEEPVWKKY
hSPCA1 -----MKVARFQKIPNGENETMIPVLTSKKASELPVSEVAGILQADLQNLNKCEVSHRRAFHGWNEFDISDEEPVWKKY
mSPCA2 --MGRRLKFLQKLAFLQNHRYKALERDEVTLIDEQCELKATEREKTVAAALPPGEACKCSREELARAFHVLDLSGLSEFAVAQRRLVHGWNEFVTDNTEPVWKKY
rSPCA2 --MGRRLKFLQKLAFLQNHRYKALERDEVTLIDEQYELKATEREKVAALPPGEACKCSREELARAFHVLDLSGLSEFAVAQRRLVHGWNEFVTDNTEPVWKKY
hSPCA2 MVEGRVSEFLKKLGFSGGGRQYQALEKDEEEALIDEQSELKATIEKEKKVTALPPKEACKCQKEDLARAFVVDLHTGLSEFVVTORRLAHGWNEFVADNSEPVWKKY

```

20                      40                      60                      \*   \*   \*   80                      \*   100

B

```

hSPCA2 MVEGRVSEFLKKLGFSGGGRQYQALEKDEEEALIDEQSELKATIEKEKKVTALPPKEACKCQKEDLARAFVVDLHTGLSEFVVTORRLAHGWNEFVADNSEPVWKKY
I-TASSER CCCCXXXXXXXXXXXXXXXXXXXXXXXXXXXXXXXXXXXXXXXXXXXXXXXXXXXXXXXXXXXXXXXXXXXXXXXXXXXXXXXXXXXXXXXXXXXXXXXXXXXXXXXXXXXX

```

20                      40                      60                      80                      100

C

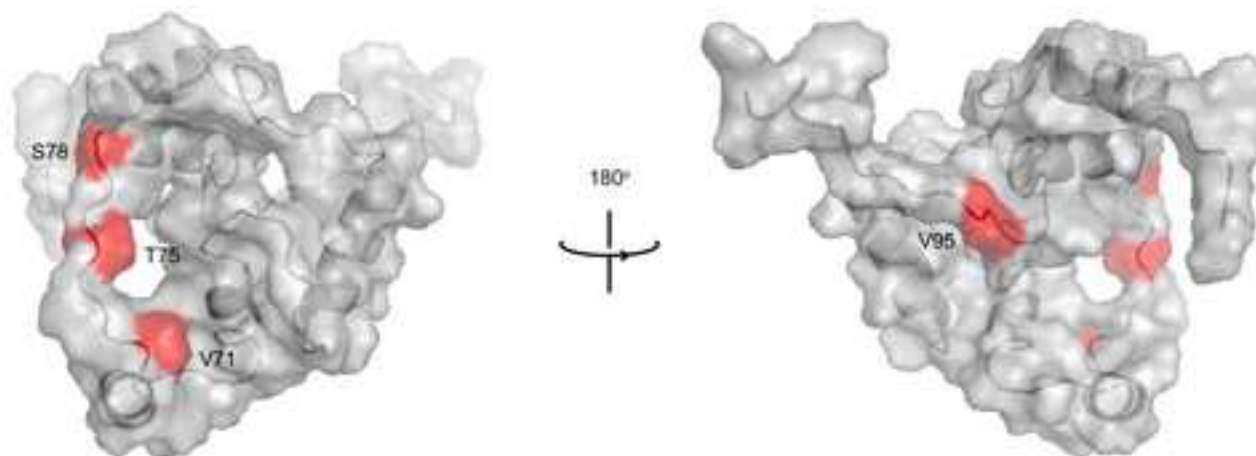

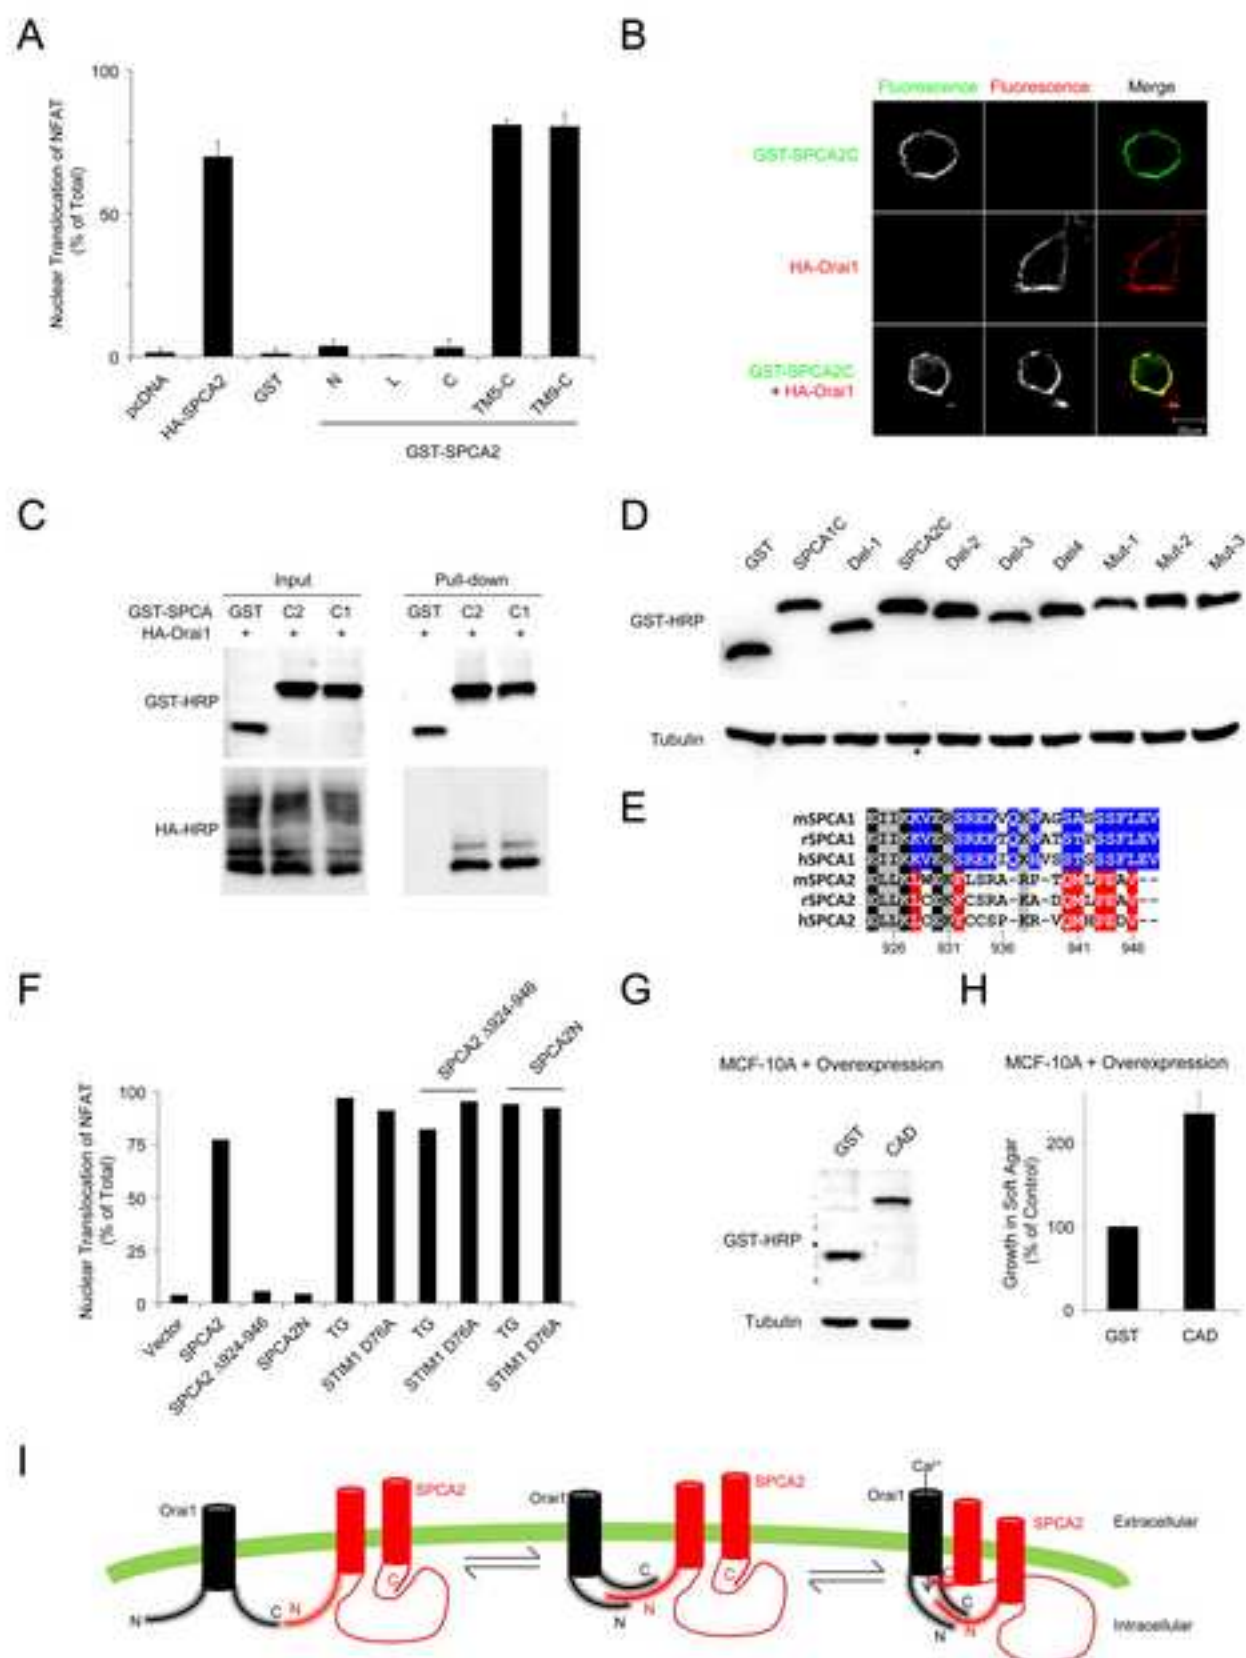

Supplement: NIHMS234350-supplement-02.pdf [file NIHMS234350-supplement-02.pdf]
